# Supplementary material for: Whole exome and genome sequencing in mendelian disorders: a diagnostic and health economic analysis
Source: PubMed Central journal article supplement (PMC9553973; doi:10.1038/s41431-022-01162-2), 2022-08-15
Supplement: 41431_2022_1162_MOESM1_ESM.pdf [file 41431_2022_1162_MOESM1_ESM.pdf]

# Whole Exome and Genome Sequencing in Mendelian Disorders: A Diagnostic and Health Economic Analysis

## Supplementary Material

Supplementary Figure 1. WGS families in cohort by body system and diagnosis status.

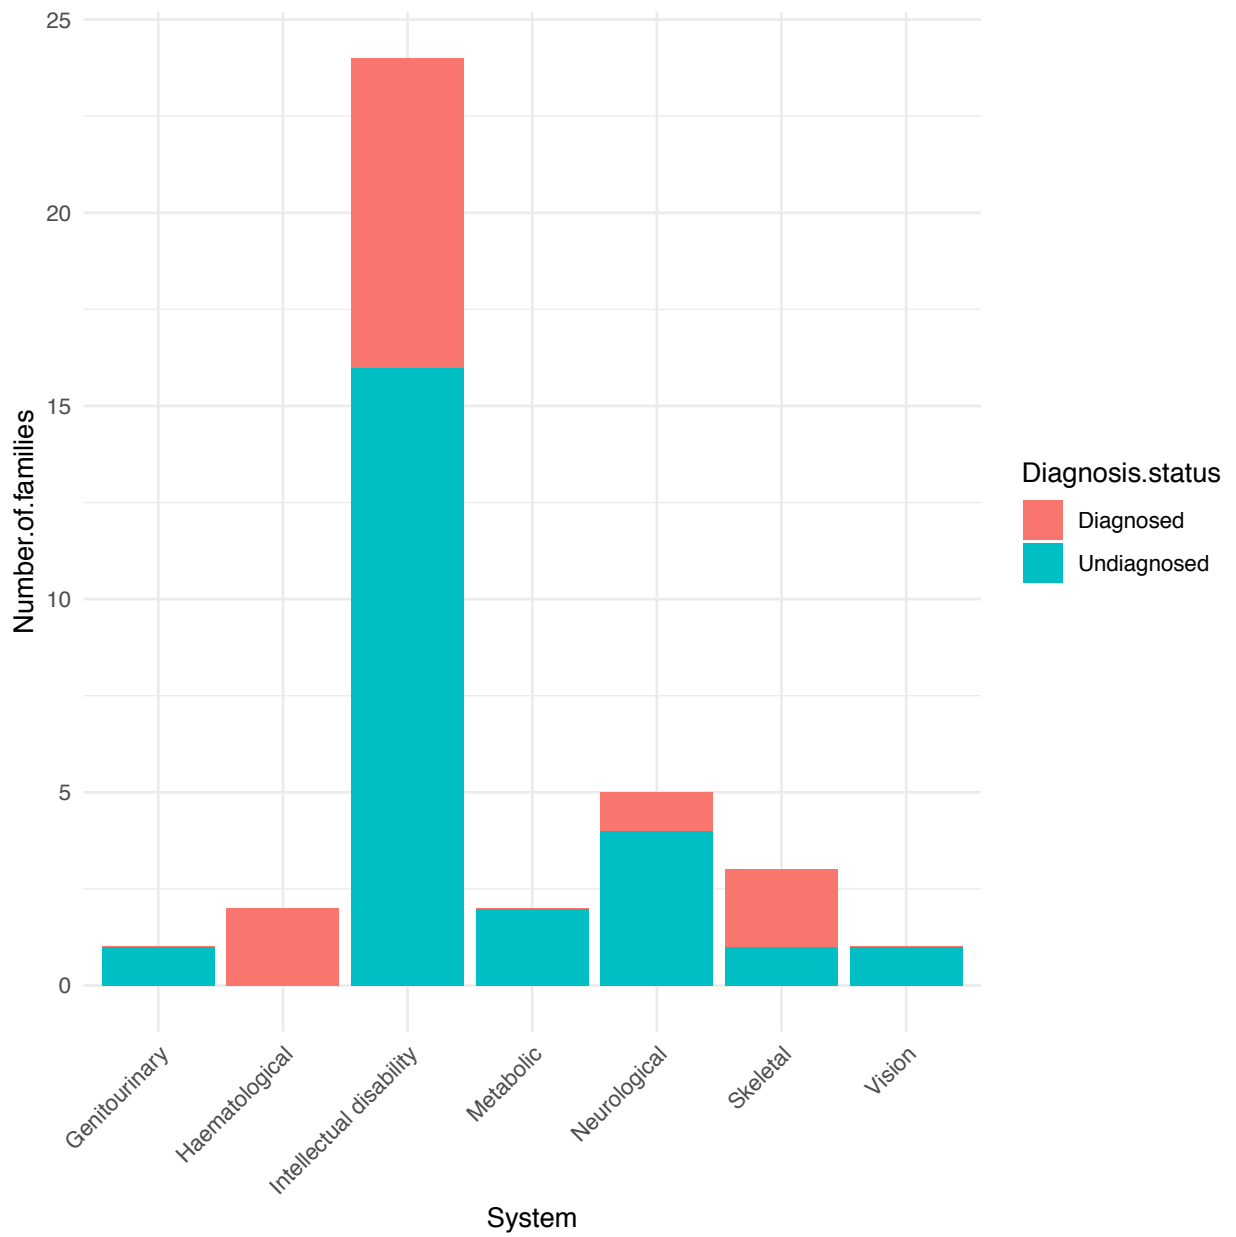

**Supplementary Figure 2. Variation in platform coverage of 5'UTR of *ANKRD26*.** (A) Integrative genomics viewer (IGV) screenshot of WGS Illumina data in 3 affected individuals with thrombocytopenia in one family; green vertical line represents heterozygous 5'UTR pathogenic variant identified. (B) Ion Proton WES coverage in the 3 affected family members of same region showing an absence of aligned data across 5'UTR. (C) Unrelated individuals using Illumina WES platform with capture across *ANKRD26* 5'UTR. (D) WES data in same region from unrelated individuals using a recent Ion Proton platform showing absence of data.

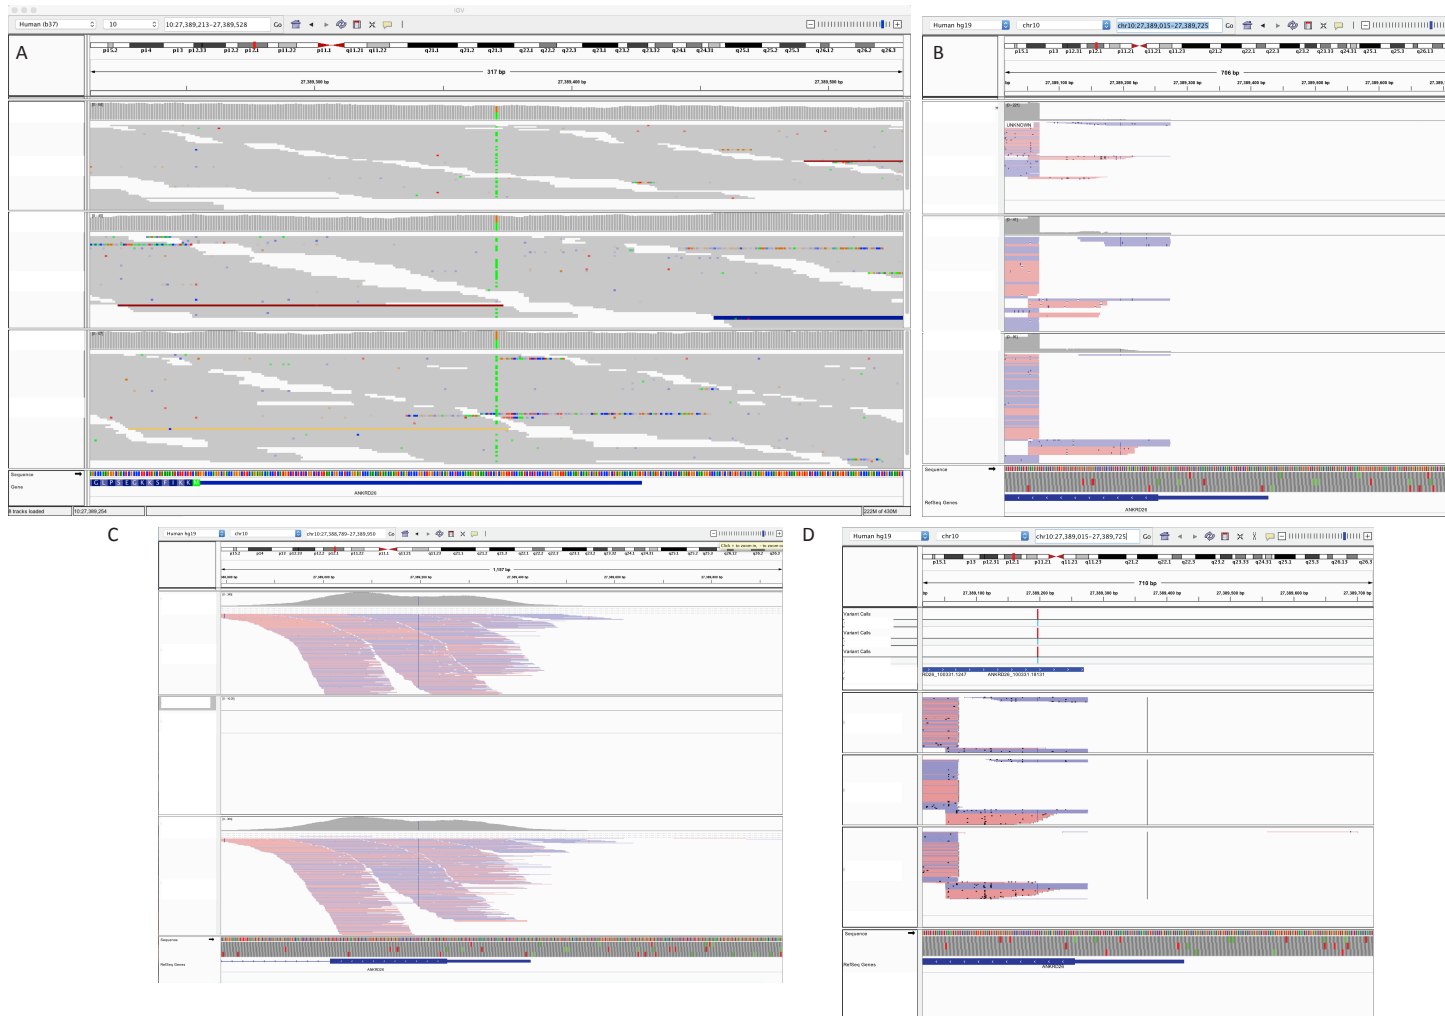

**Supplementary Figure 3. Incremental costs of additional initial genomic diagnoses are more sensitive to WGS costs.** Tornado plot showing a one-way sensitivity economic analysis in simulated early genomic testing cohort. Incremental costs (AU\$) for each additional initial WGS diagnosis are compared to initial WES for a range of WES and WGS costs from the available laboratories. The increased sensitivity to WGS costs are primarily driven by the wider range of WGS costs.

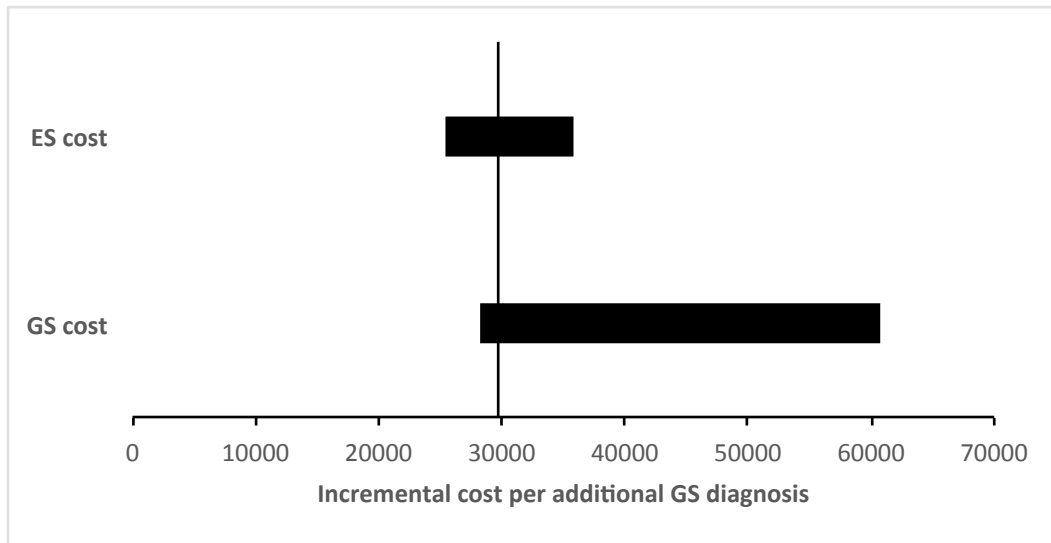

**Supplementary Figure 4. Contemporary WES coverage of genomic locations of WGS diagnoses missed on older WES. (A) *ANKRD26*:**

chr10(GRCh37):g.27389371G>A (chr10(GRCh38):g.27100442); Family 2 (B) *ALG11*: chr13(GRCh37):g.52599050T>C (chr13(GRCh38):g.52024914); Family 3 (C) *AP1S2*: chrX(GRCh37):g.15872810C>T (chrX(GRCh38):g.15854687); Family 5 (D) *ERF*: chr19(GRCh37):g.42759128A>C (chr19(GRCh38):g.42254976); Family 12. Sequencing performed in unrelated individuals using Illumina NovaSeq ES CREv2.

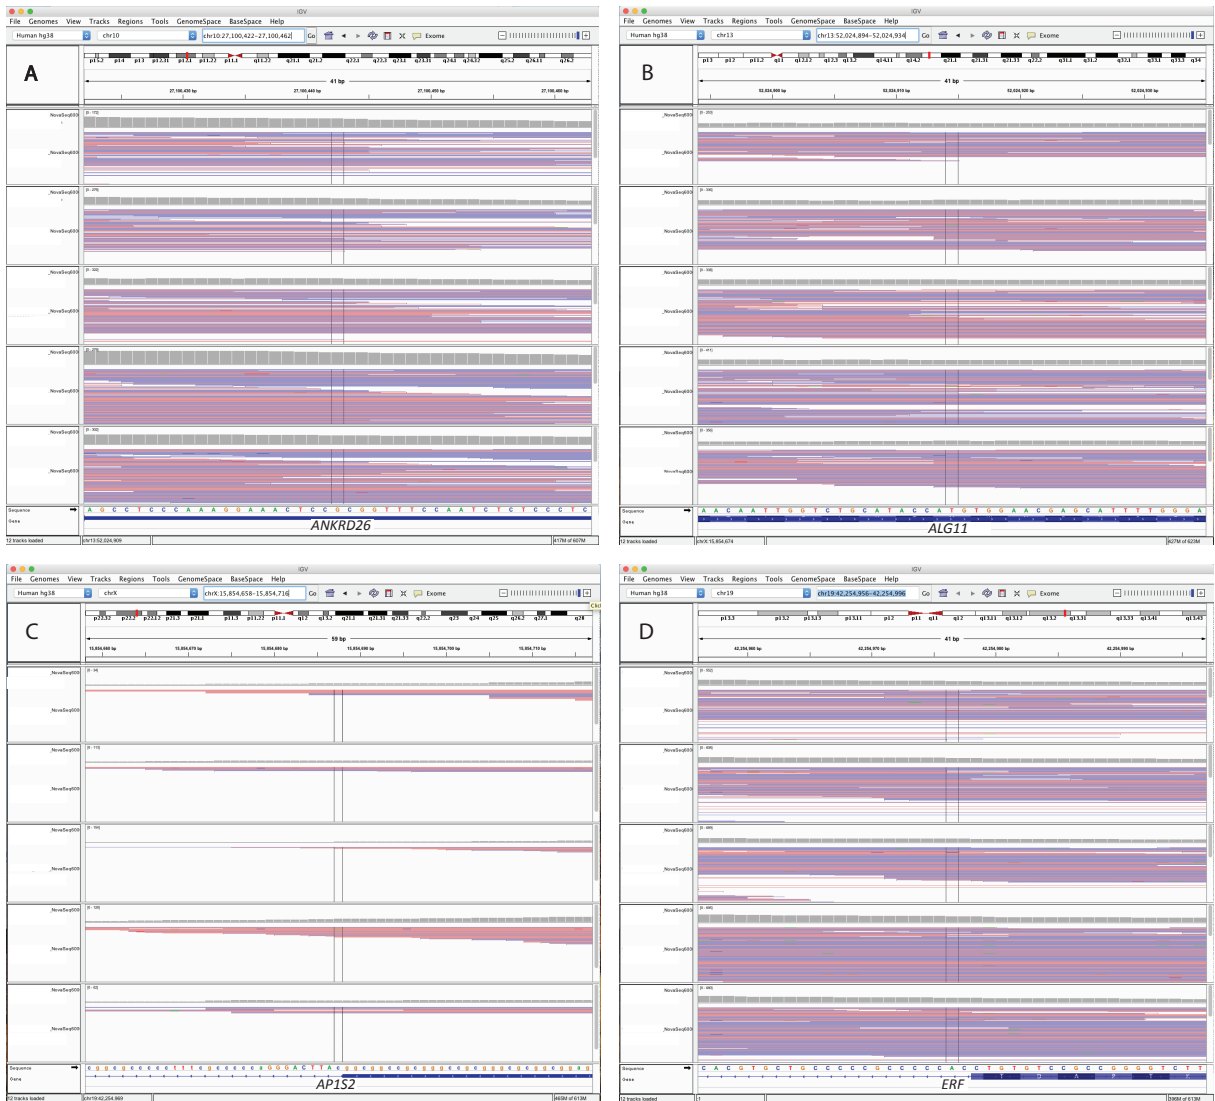

**Supplementary Table 1. Test costs utilised for economic analyses. 6**

diagnostic laboratories offering WES & WGS were identified and contacted by email for pricing structure. Of these, 3 laboratories offered both singleton WES and WGS (Centogene; Perkin Elmer; VCGS). Prices were converted to Australian Dollars as of 13<sup>th</sup> May 2020

(<https://www.xe.com/currencytables/?from=AUD&date=2020-05-13#table-section>). Costs were broken-down into various family structures consistent with at least 1 referred family in the Mendelian cohorts. Average costs between laboratories were calculated. Costs from Victorian Clinical Genetics Service (VCGS), an Australian laboratory, were selected as the local diagnostic laboratory offering both WES and WGS.

| Test           | Cost breakdown by: family structure / sequencing / analysis / report | VCGS (Australian lab; AU Dollars) | Costs for sensitivity analysis |         |
|----------------|----------------------------------------------------------------------|-----------------------------------|--------------------------------|---------|
|                |                                                                      |                                   | Lowest                         | Highest |
| WES            | Singleton                                                            | 3166                              | 1838                           | 3166    |
|                | 2 probands                                                           | 3778                              | 3258                           | 3778    |
|                | 3 probands                                                           | 4391                              | 4391                           | 5570    |
|                | Trio                                                                 | 4187                              | 3713                           | 4846    |
|                | Trio + 1 proband                                                     | 4800                              | 4800                           | 6016    |
|                | Trio + 2 probands                                                    | 5412                              | 5412                           | 7427    |
|                | Trio (2 probands, 1 unaffected)                                      | 4289                              | 4289                           | 4846    |
|                | 3 probands + 1 unaffected                                            | 4902                              | 4902                           | 6016    |
|                | Additional sequencing / individual                                   | 511                               | /                              | /       |
|                | Additional proband (sequencing + report)                             | 613                               | /                              | /       |
| WES reanalysis | Per report                                                           | 102                               | 102                            | 309     |
|                | Per analysis                                                         | 357                               | 309                            | 357     |
|                | E.g. 2 probands                                                      | 460                               | 460                            | 619     |
| WGS            | Singleton                                                            | 4391                              | 3868                           | 4929    |
|                | 2 probands                                                           | 6076                              | 6076                           | 8271    |
|                | 3 probands                                                           | 7761                              | 7761                           | 11604   |
|                | Trio                                                                 | 7557                              | 7557                           | 11446   |
|                | Trio + 1 proband                                                     | 9242                              | 9242                           | 14705   |
|                | Trio + 2 probands                                                    | 10927                             | 10927                          | 14705   |
|                | Trio (2 probands, 1 unaffected)                                      | 7659                              | 7659                           | 11446   |
|                | 3 probands + 1 unaffected                                            | 9446                              | 9446                           | 14705   |
|                | Additional sequencing / individual                                   | 1583                              | /                              | /       |
|                | Additional proband (sequencing + report)                             | 1685                              | /                              | /       |

**Supplementary Table 2. Comparison of cohort demographics between WES-negative and 64 family genomic-naïve cohort.**

Key: a, As at January 1 2017; b, less than 16 years; NS-ID, non-syndromic intellectual disability; S-ID, syndromic intellectual disability

|                                               |                               | WES-negative cohort | Genomic-naïve cohort<br>(Includes 38 WES-negative families) |
|-----------------------------------------------|-------------------------------|---------------------|-------------------------------------------------------------|
| Families                                      |                               | 38                  | 64                                                          |
| Probands                                      |                               | 59                  | 91                                                          |
| Proband Sex                                   | Male                          | 64% (38/59)         | 62% (56/91)                                                 |
|                                               | Female                        | 36% (21/59)         | 38% (35/91)                                                 |
| Proband average age (years) <sup>a</sup>      |                               | 22                  | 19                                                          |
| Proportion pediatric age range <sup>a,b</sup> |                               | 49% (29/59)         | 57% (52/91)                                                 |
| Family referral structure for sequencing      | Trio study                    | 55% (21/38)         | 52% (33/64)                                                 |
|                                               | Singleton                     | 8% (3/38)           | 16% (10/64)                                                 |
|                                               | Multiple affected individuals | 37% (14/38)         | 33% (21/64)                                                 |
| Mendelian disorder grouping                   | Genitourinary                 | 3% (1/38)           | 2% (1/64)                                                   |
|                                               | Hematological                 | 5% (2/38)           | 6% (4/64)                                                   |
|                                               | Immunological                 | 0%                  | 3% (2/64)                                                   |
|                                               | Metabolic                     | 5% (2/38)           | 5% (3/64)                                                   |
|                                               | Neurological                  | 13% (5/38)          | 14% (9/64)                                                  |
|                                               | NS-ID                         | 18% (7/38)          | 13% (8/64)                                                  |
|                                               | S-ID                          | 45% (17/38)         | 44% (28/64)                                                 |
|                                               | Skeletal                      | 8% (3/38)           | 9% (6/64)                                                   |
|                                               | Syndromic                     | 0%                  | 2% (1/64)                                                   |
| Visual                                        | 3% (1/38)                     | 3% (2/64)           |                                                             |
